# Supplementary material
Source: PubMed Central journal article supplement (PMC7983568)
Supplement: etj-0010-0086-s01.pdf [file etj-0010-0086-s01.pdf]

Patient n°2

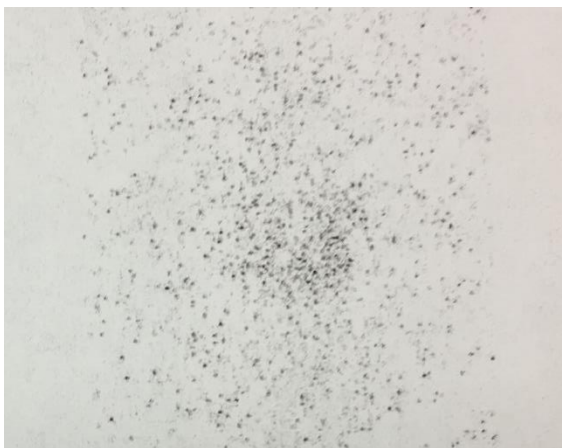

Patient n°8

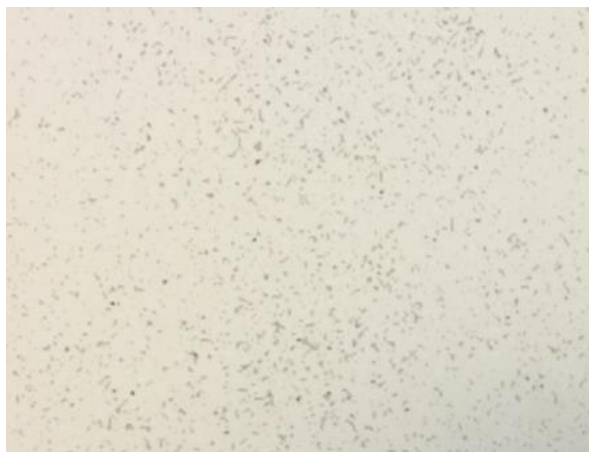

Patient n°11

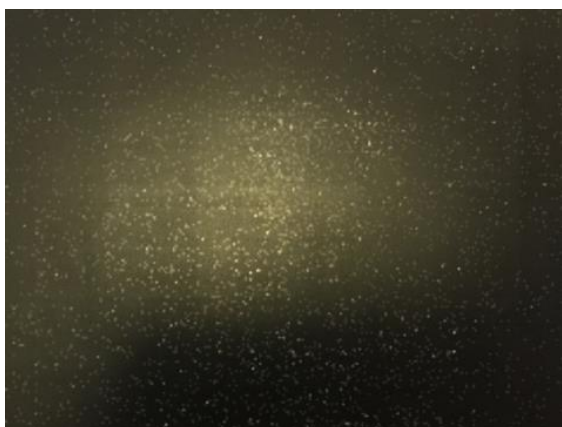

Patient n°14

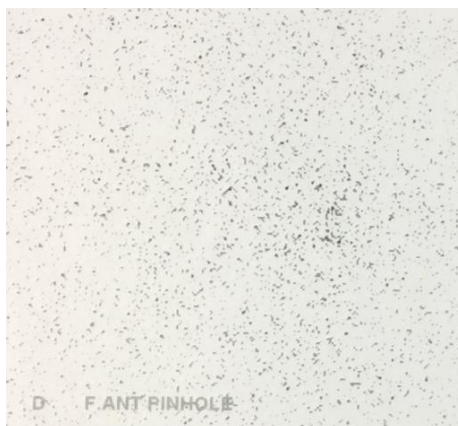

Patient n°16

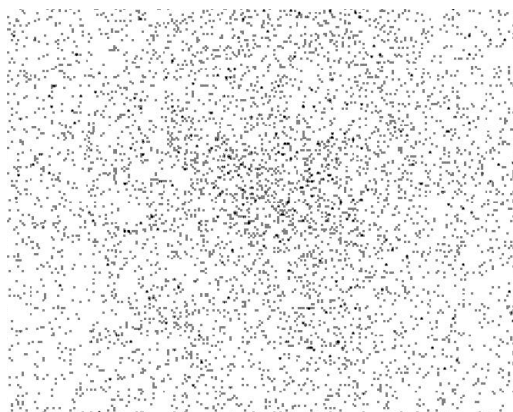

**Supplementary Figure**

123 iodine thyroid scintigraphy of patients with type 2 AIT.
